# Supplementary material for: Differences in the expression of chromosome 1 genes between lung telocytes and other cells: mesenchymal stem cells, fibroblasts, alveolar type II cells, airway epithelial cells and lymphocytes
Source: PubMed Central journal article supplement (PMC4119386; doi:10.1111/jcmm.12302), 2014-05-15
Supplement: jcmm0018-0801-SD1.pdf [file jcmm0018-0801-SD1.pdf]

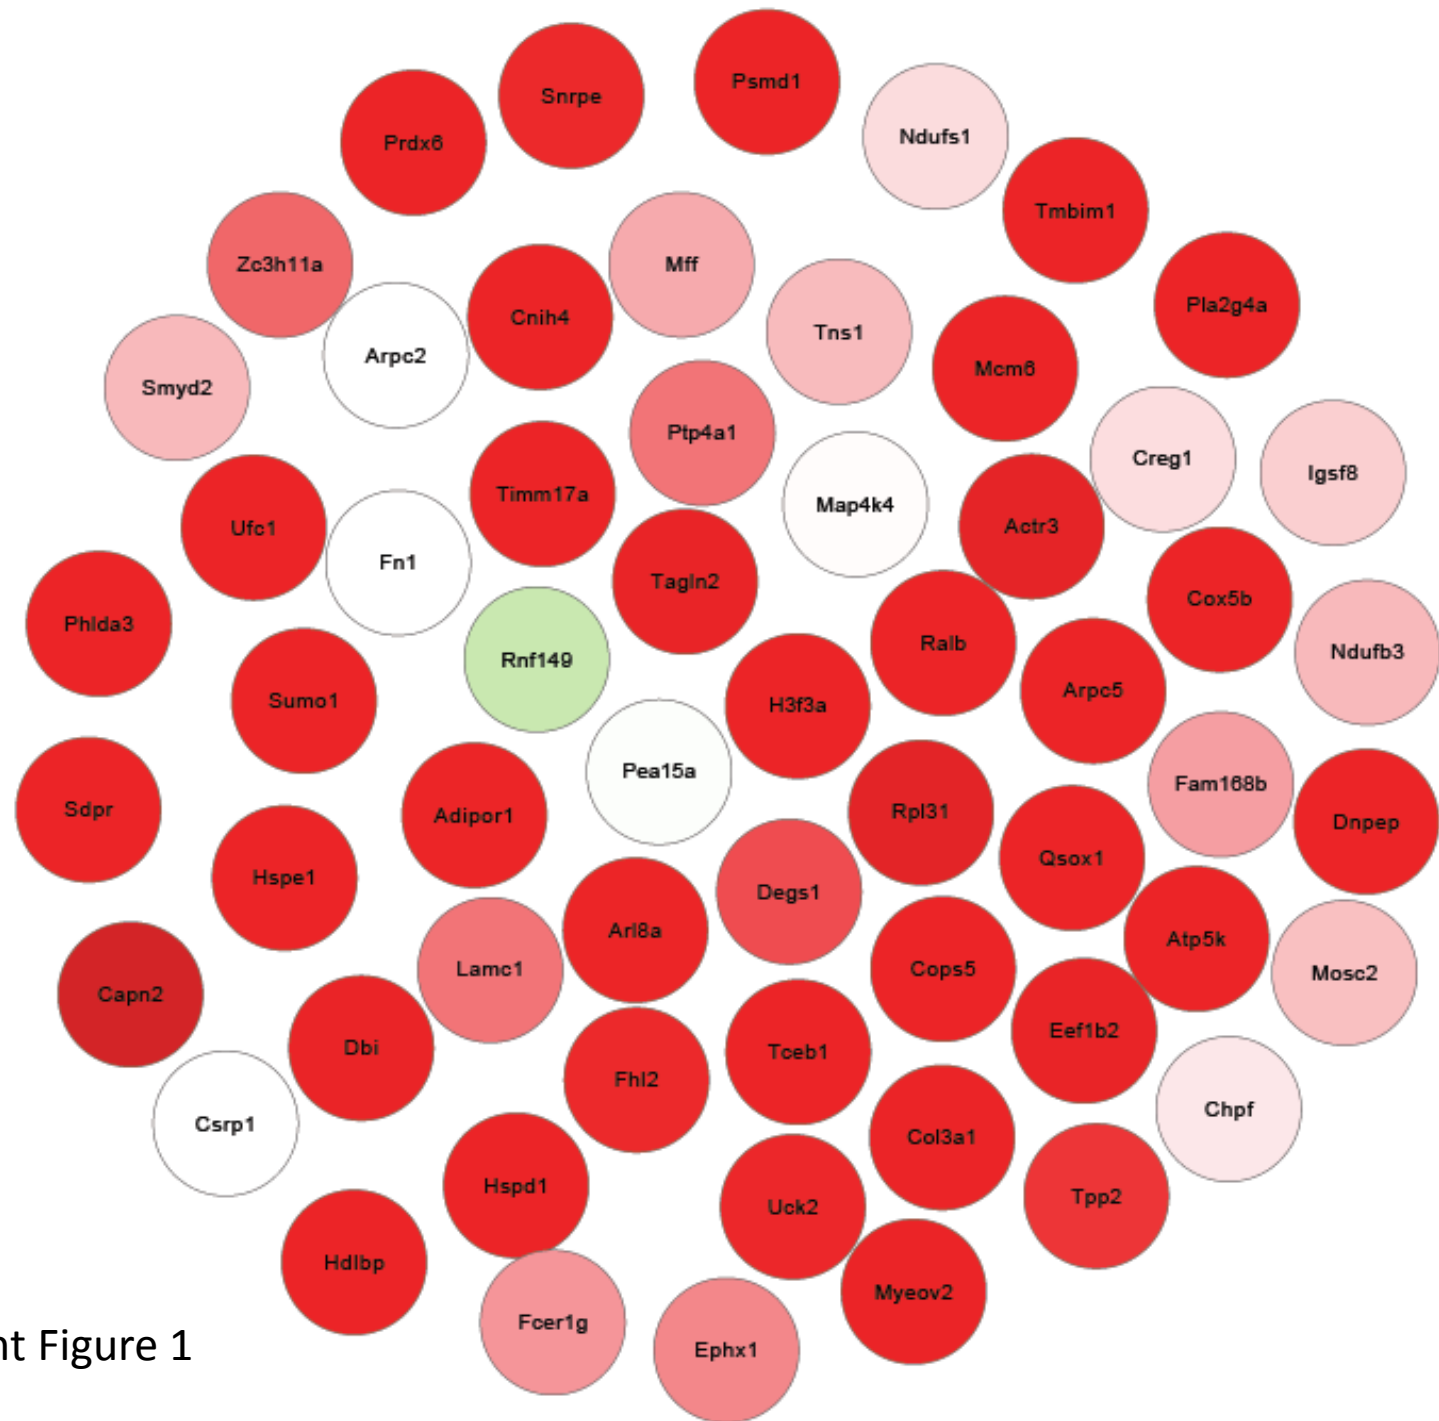

Supplement Figure 1

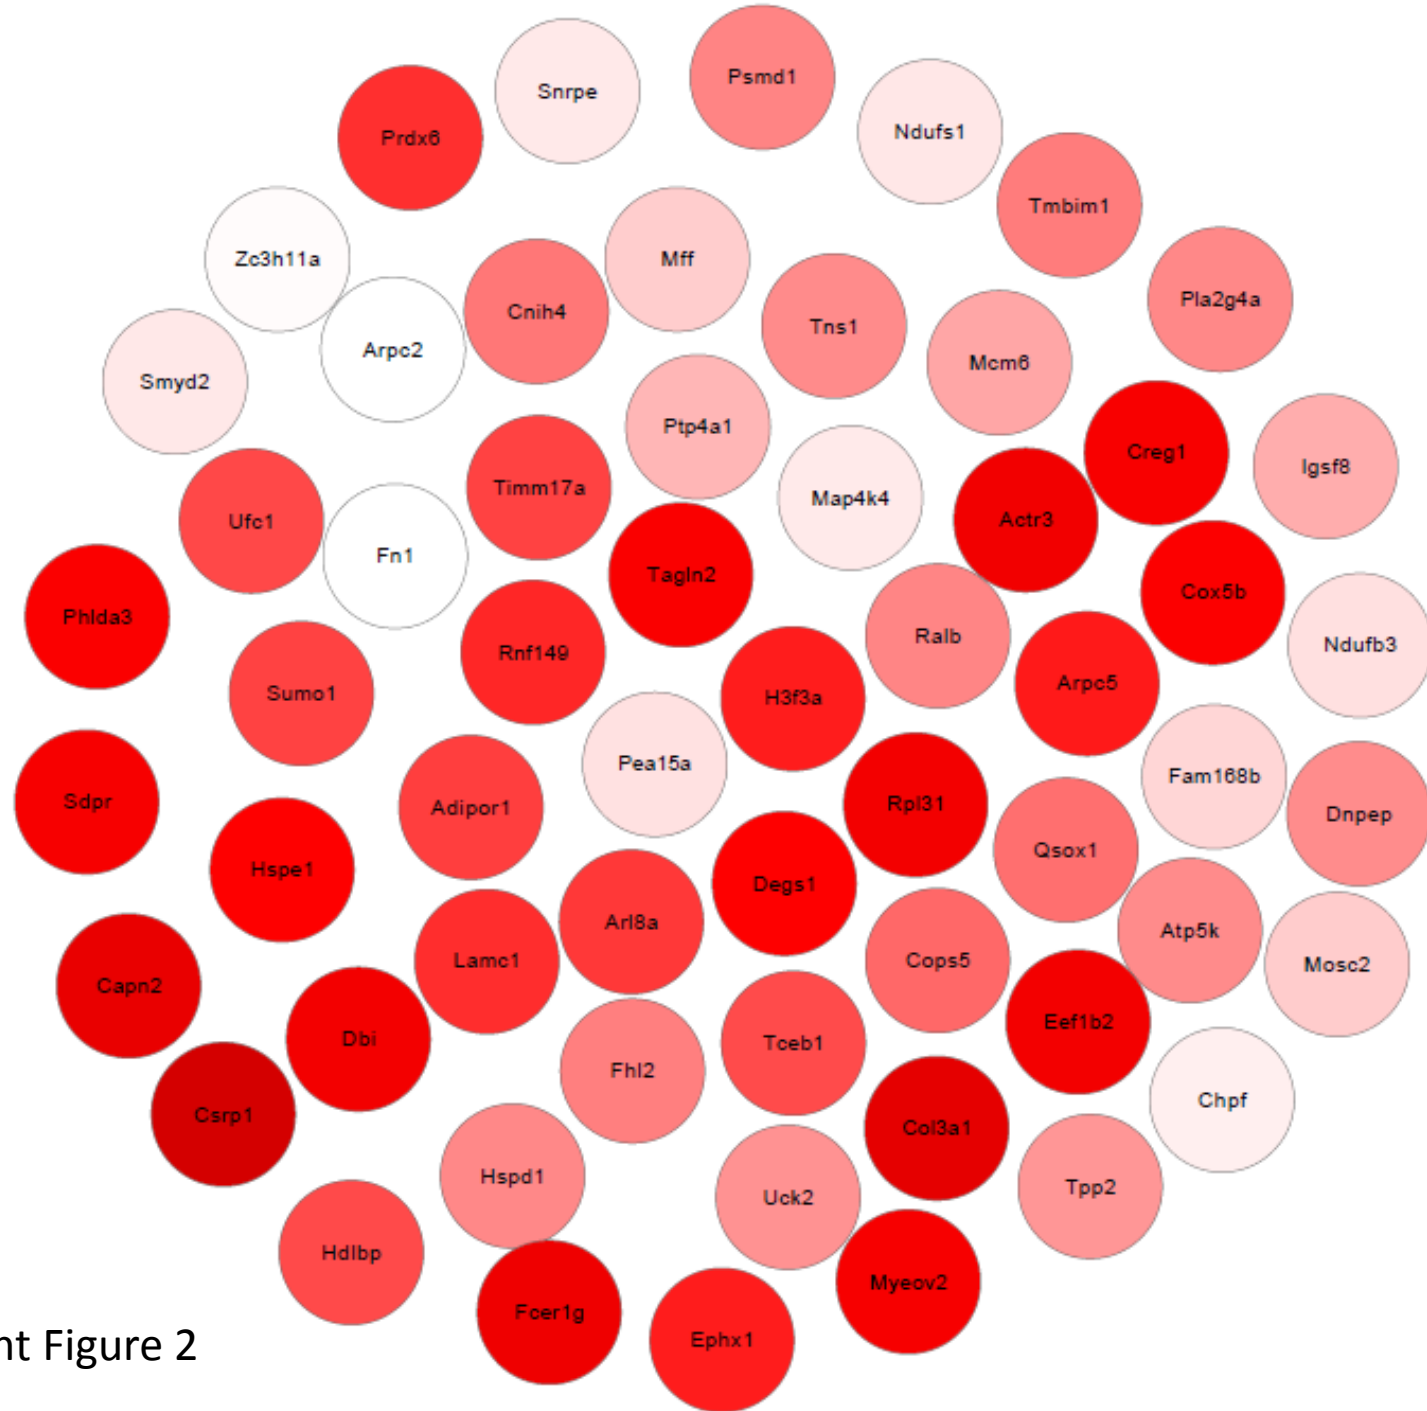

Supplement Figure 2

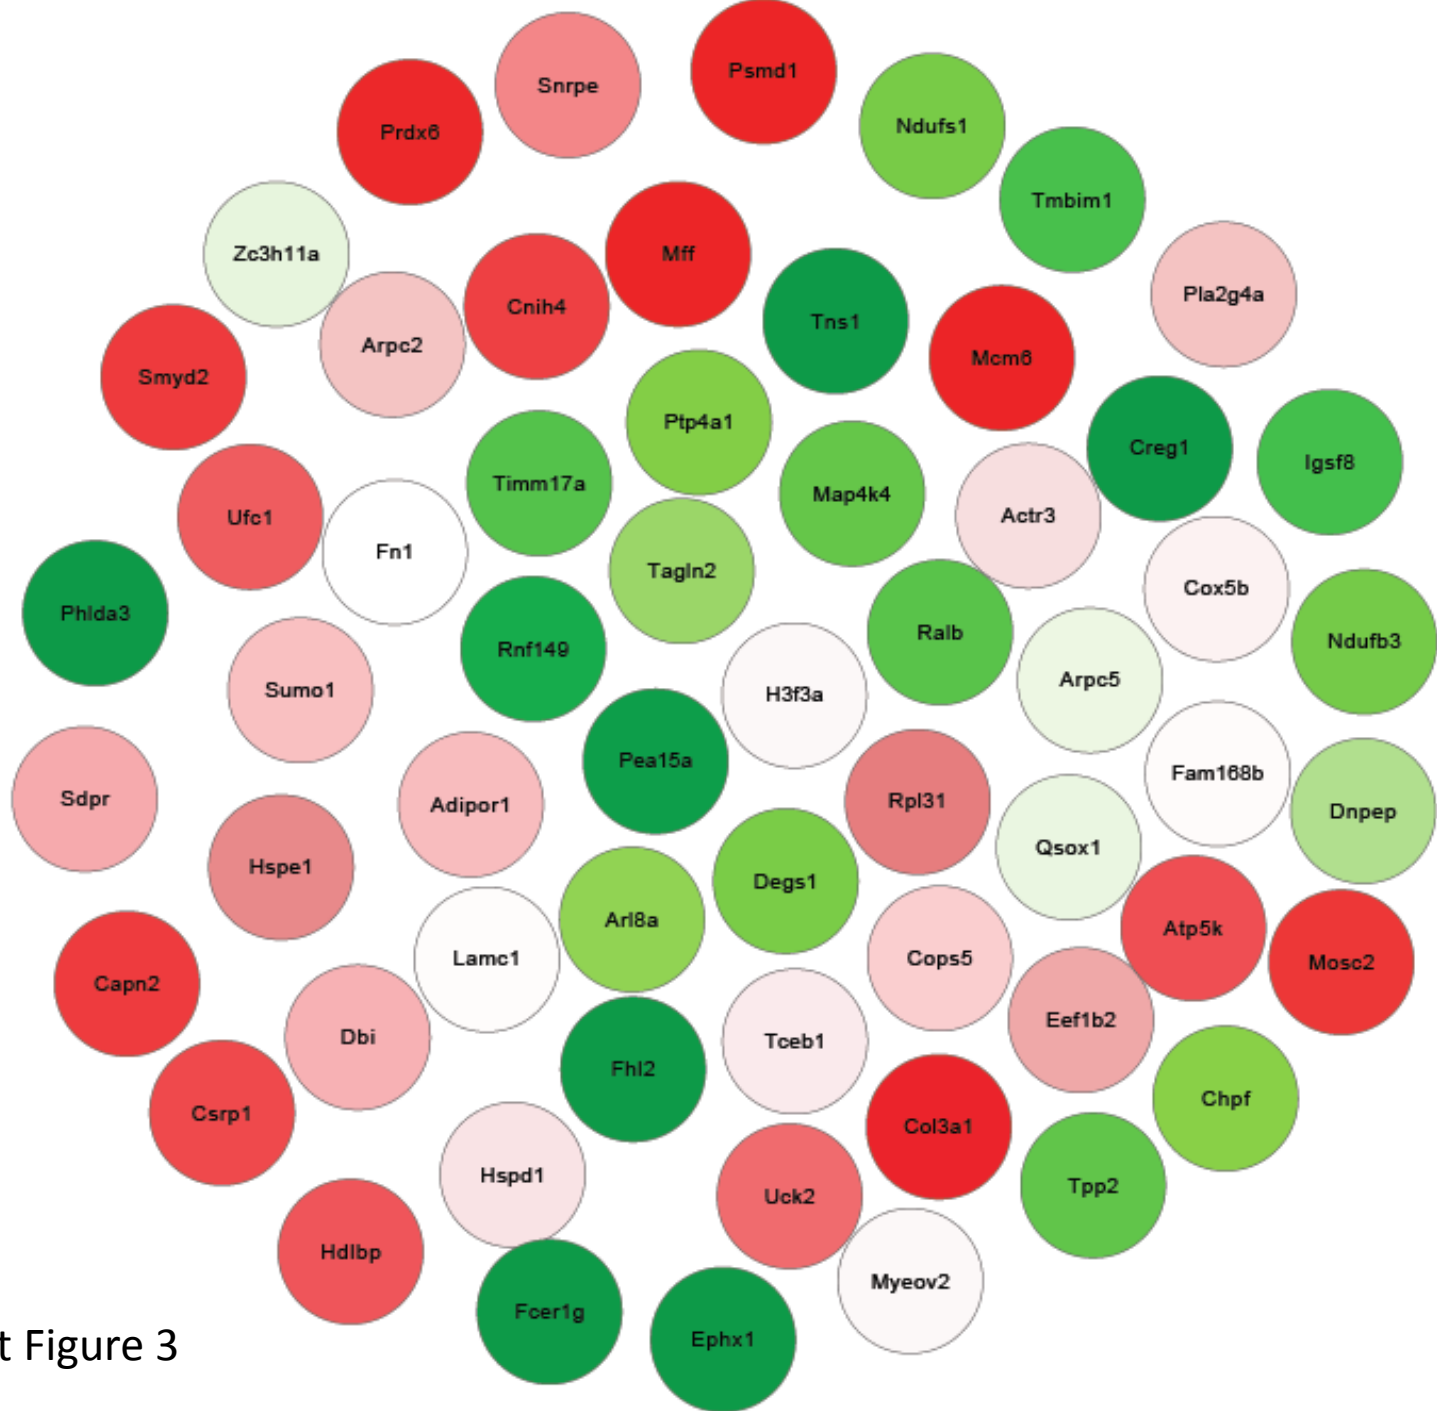

Supplement Figure 3

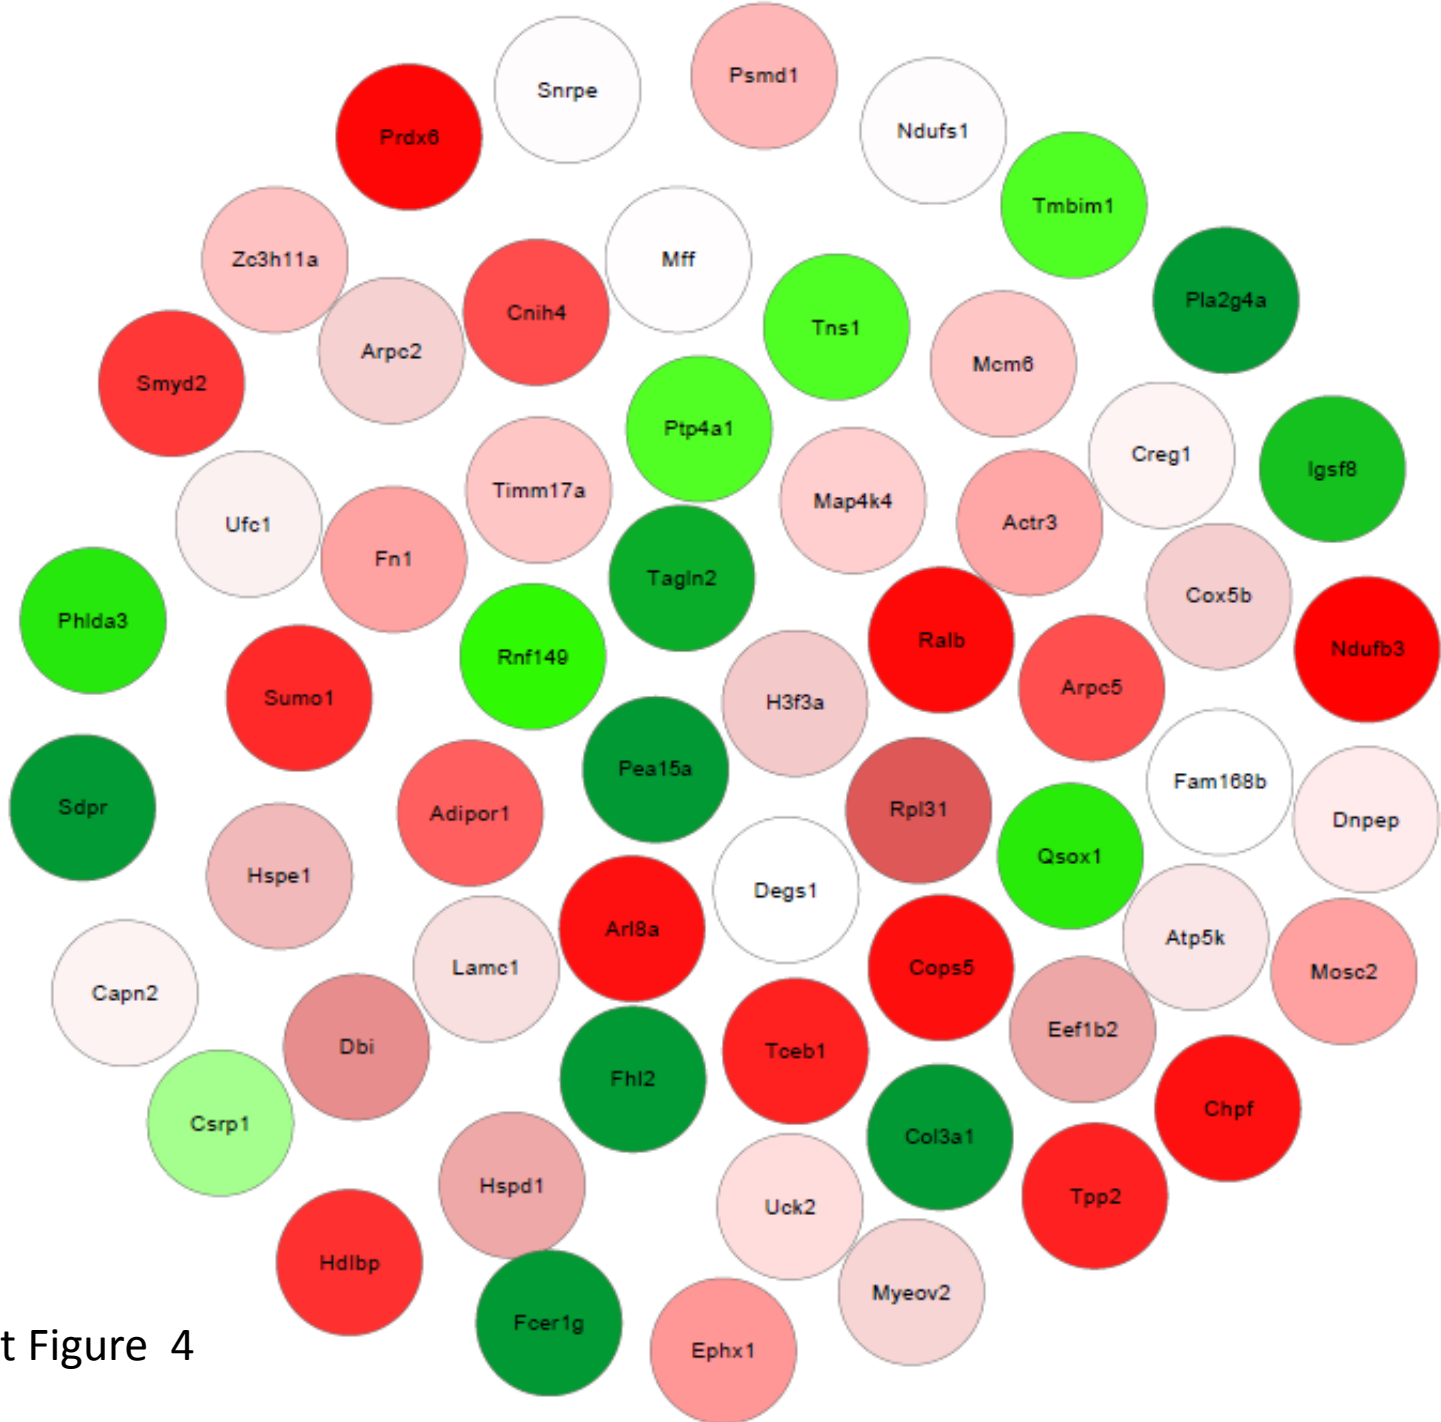

Supplement Figure 4

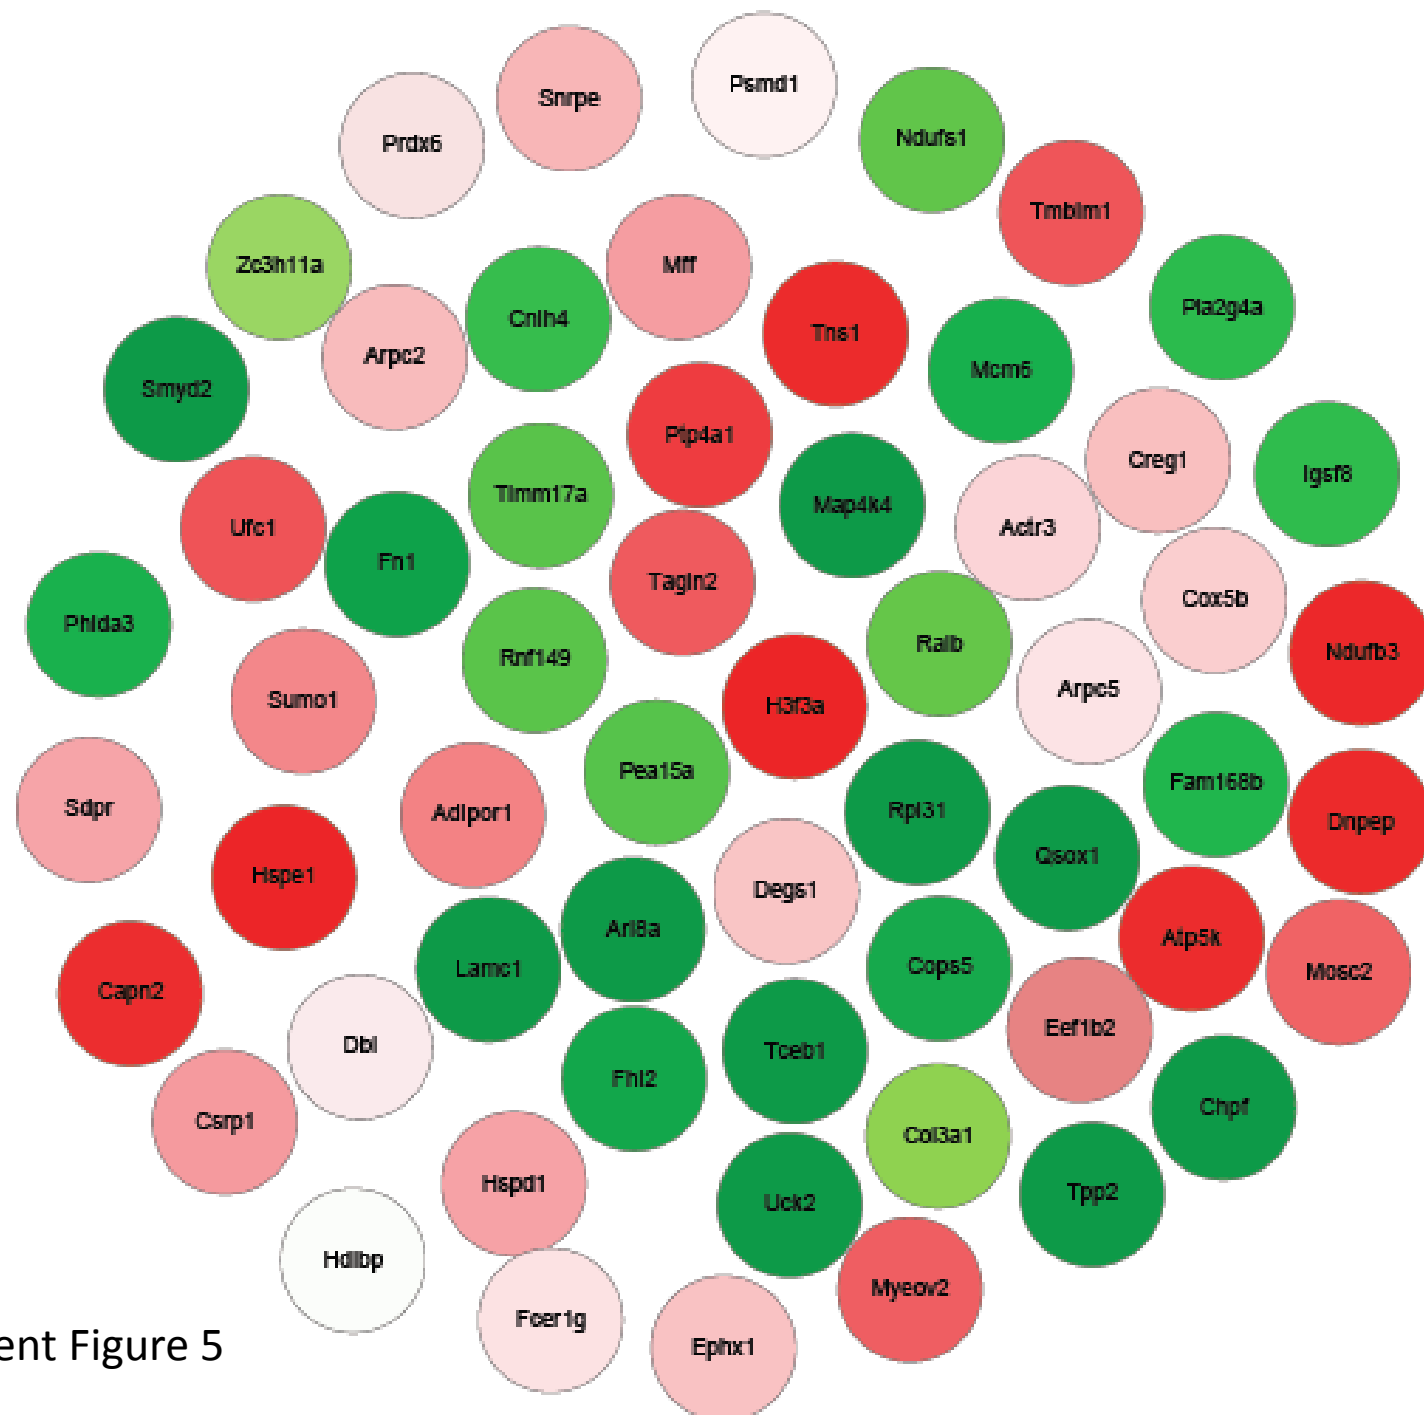

Supplement Figure 5

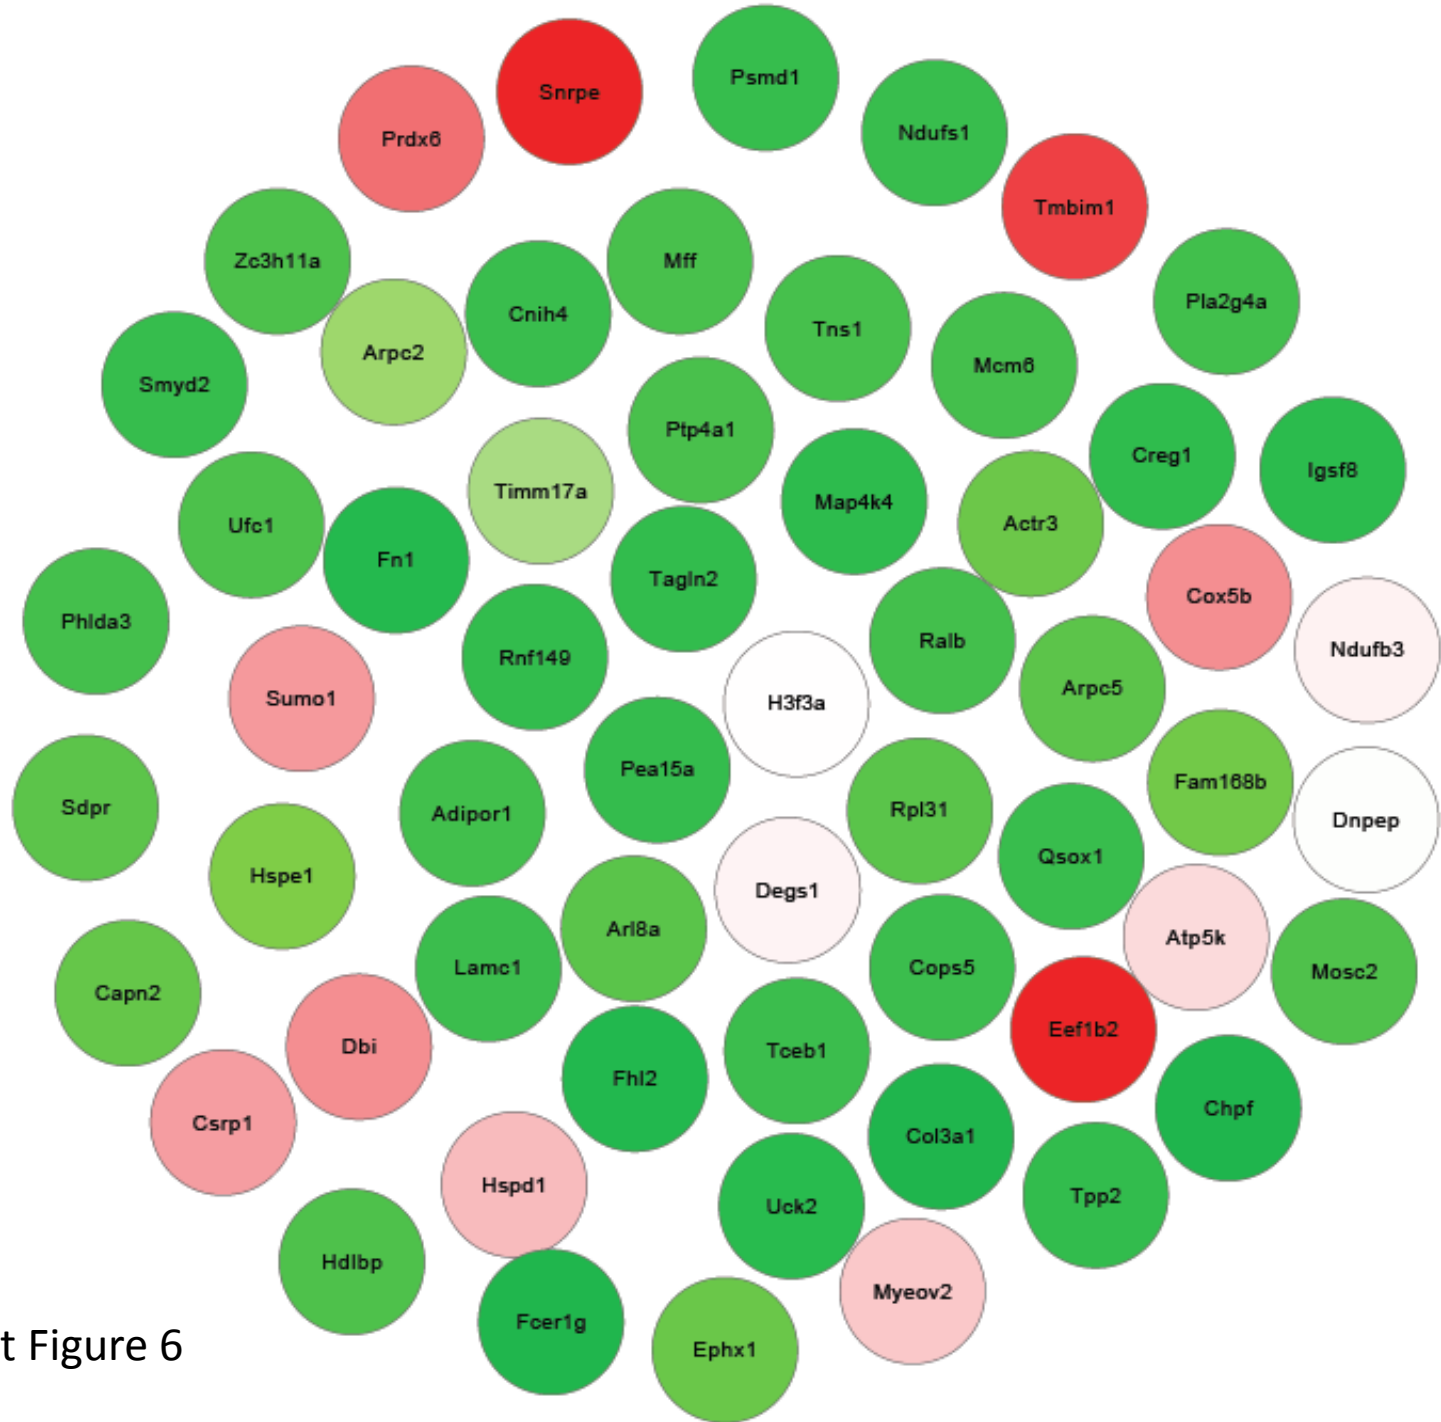

Supplement Figure 6

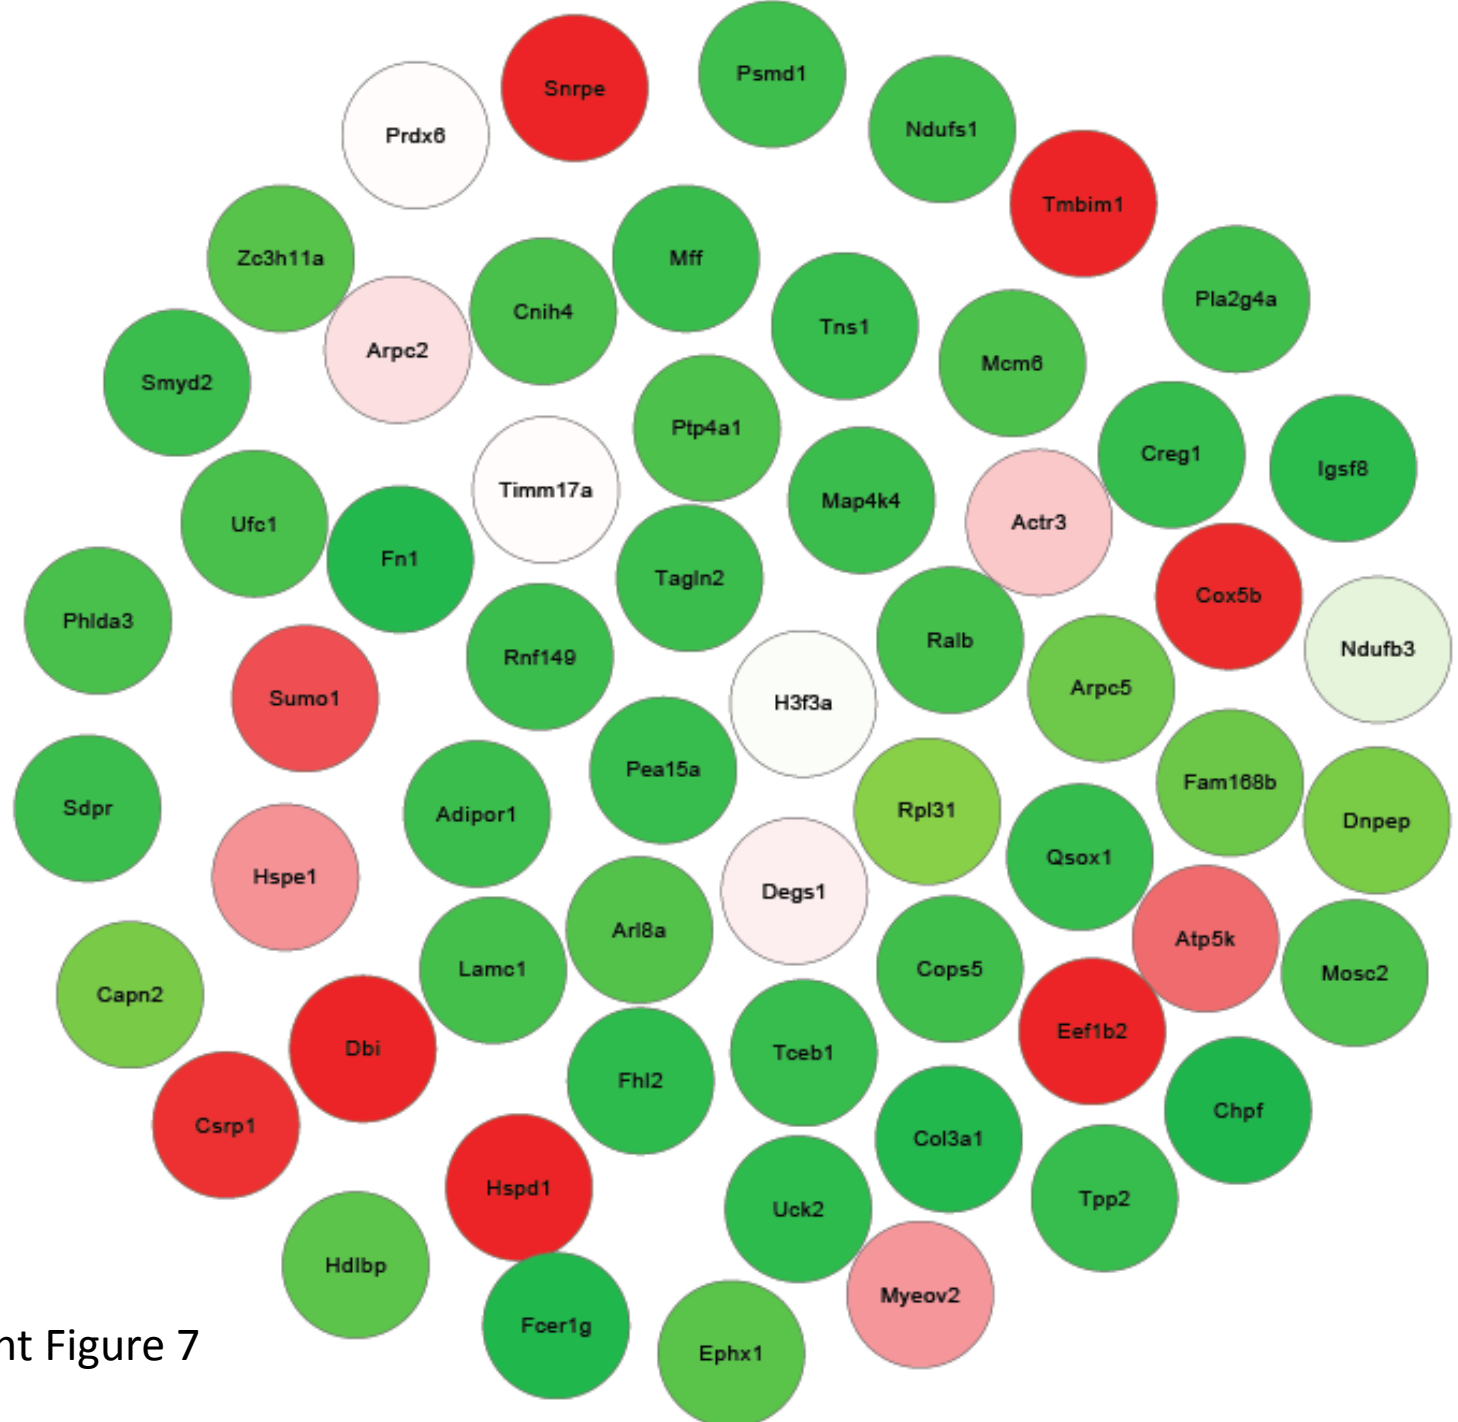

Supplement Figure 7

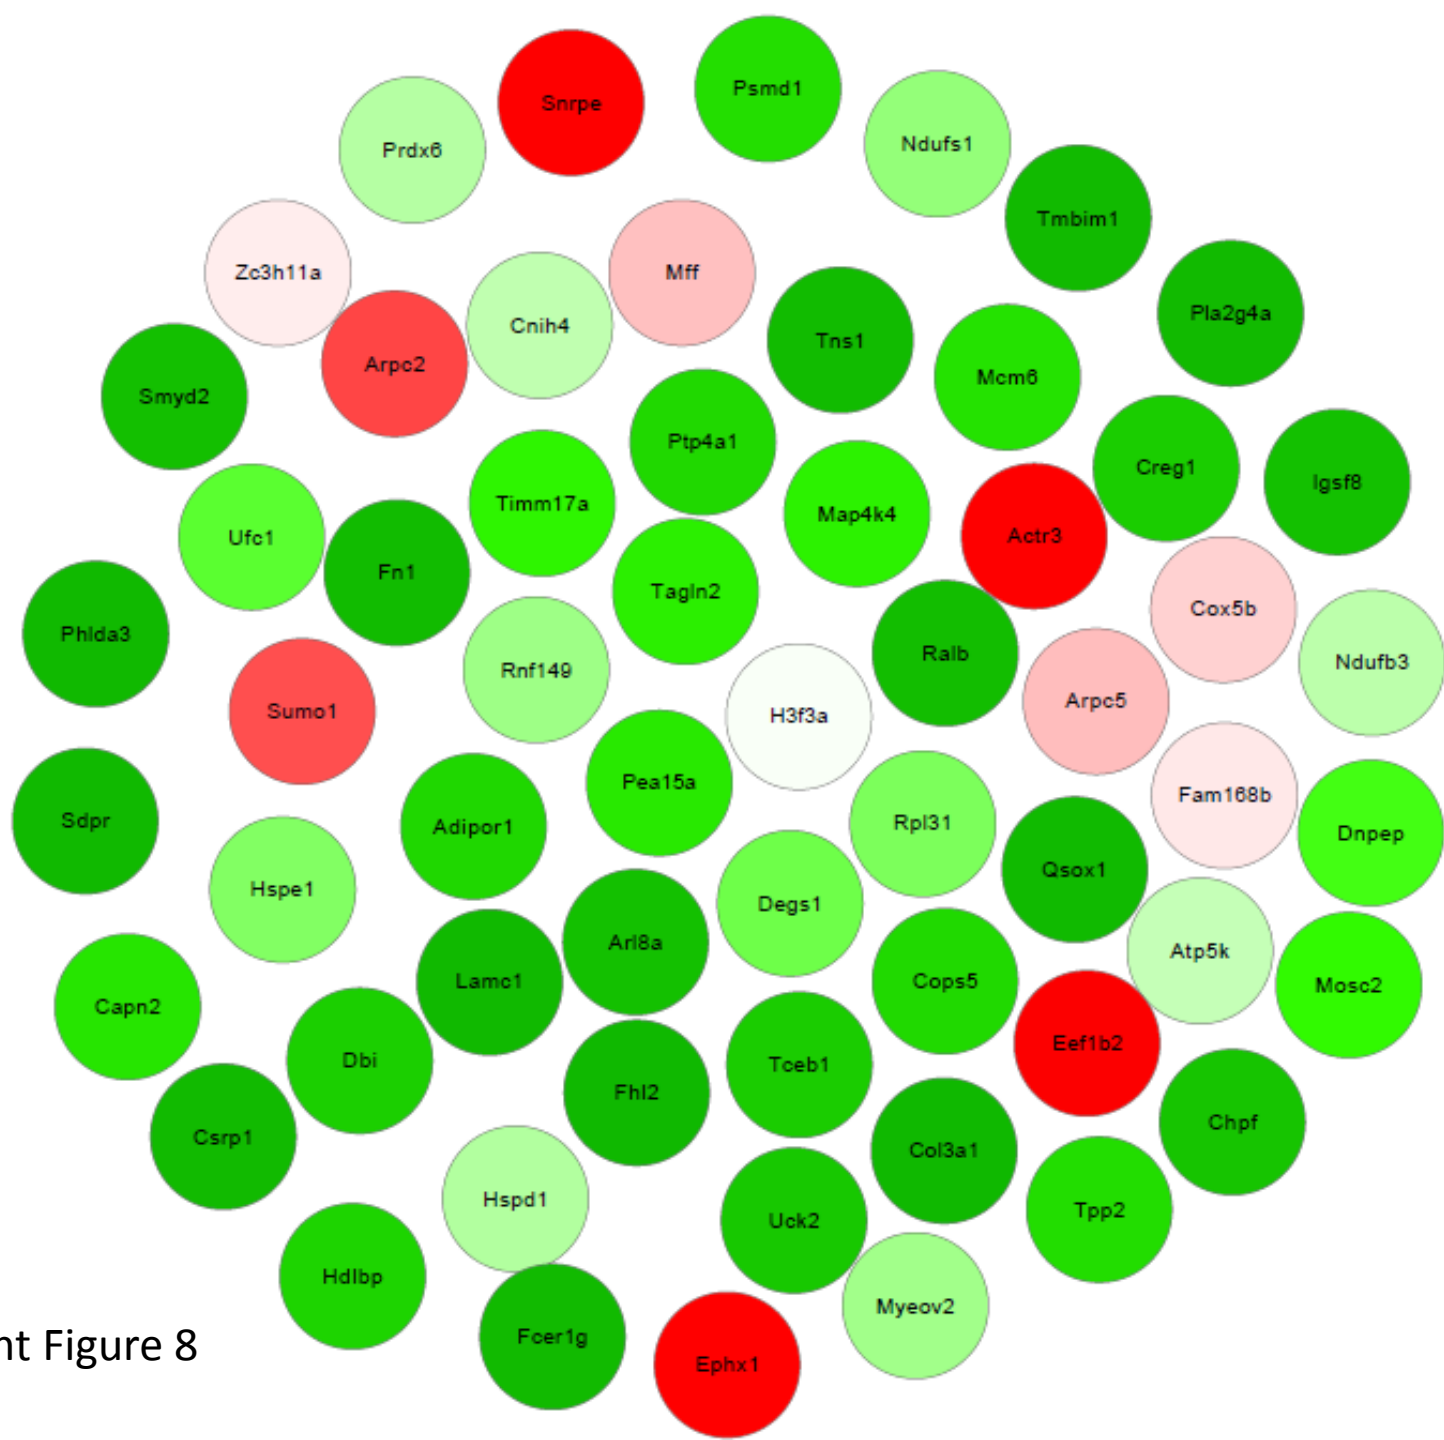

Supplement Figure 8



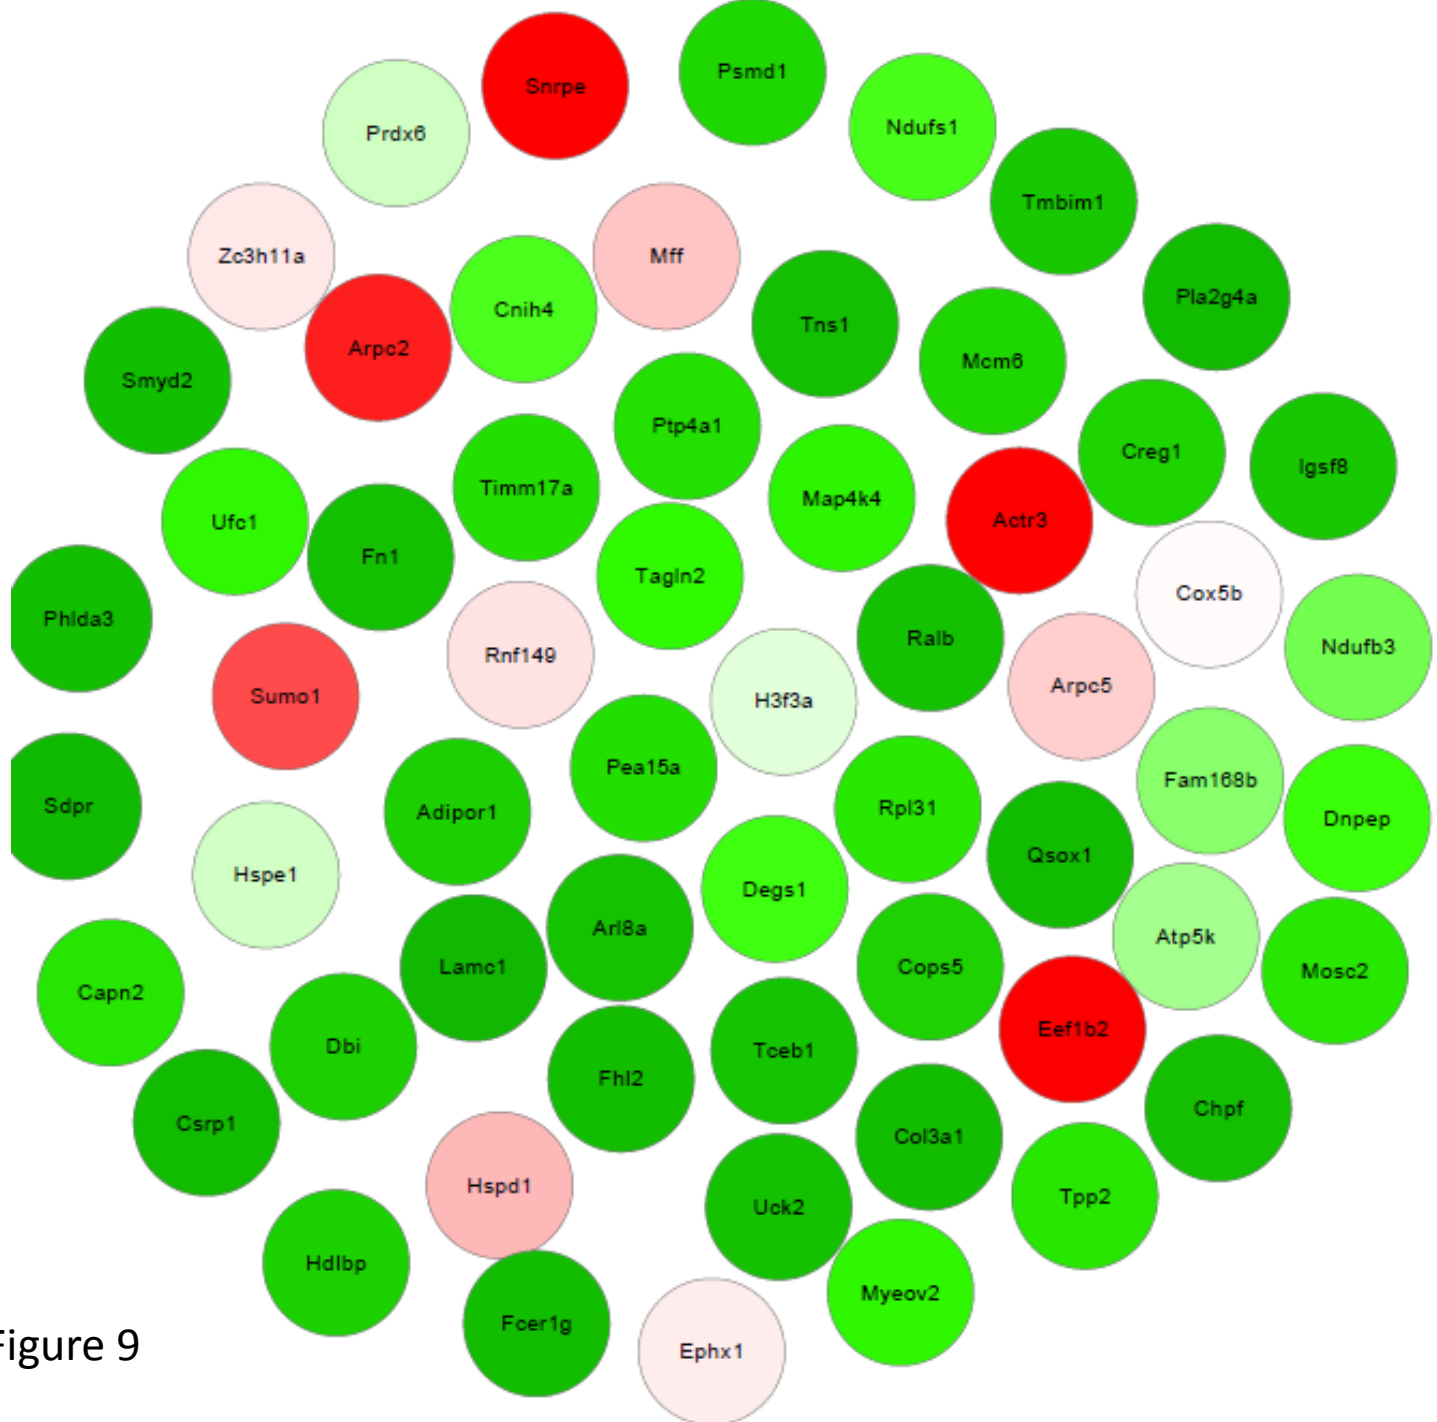

Supplement Figure 9
